# Supplementary material for: Reconstruction of Toll-like receptor 9-mediated responses in HEK-Blue hTLR9 cells by transfection of human macrophage scavenger receptor 1 gene
Source: PubMed Central journal article supplement (PMC5651873; doi:10.1038/s41598-017-13890-3), 2017-10-20
Supplement: 41598_2017_13890_MOESM1_ESM.pdf [file 41598_2017_13890_MOESM1_ESM.pdf]

# **Reconstruction of Toll-like receptor 9-mediated responses in HEK-Blue hTLR9 cells by transfection of human macrophage scavenger receptor 1 gene**

Shozo Ohtsuki<sup>1</sup>, Yuki Takahashi<sup>1</sup>, Takao Inoue<sup>2</sup>, Yoshinobu Takakura<sup>1</sup> and Makiya Nishikawa<sup>1,3,\*</sup>

<sup>1</sup> Department of Biopharmaceutics and Drug Metabolism, Graduate School of Pharmaceutical Sciences, Kyoto University, Sakyo-ku, Kyoto 606-8501, Japan

<sup>2</sup> Division of Molecular Target and Gene Therapy Products, National Institute of Health Sciences, Setagaya-ku, Tokyo 158-8501, Japan

<sup>3</sup> Laboratory of Biopharmaceutics, Faculty of Pharmaceutical Sciences, Tokyo University of Science, Noda, Chiba 278-8510, Japan

\* To whom correspondence should be addressed. Tel: +81-4-7121-4450; Fax: +81-4-7121-4450; Email: [makiya@rs.tus.ac.jp](mailto:makiya@rs.tus.ac.jp)

## **Supplementary Information**

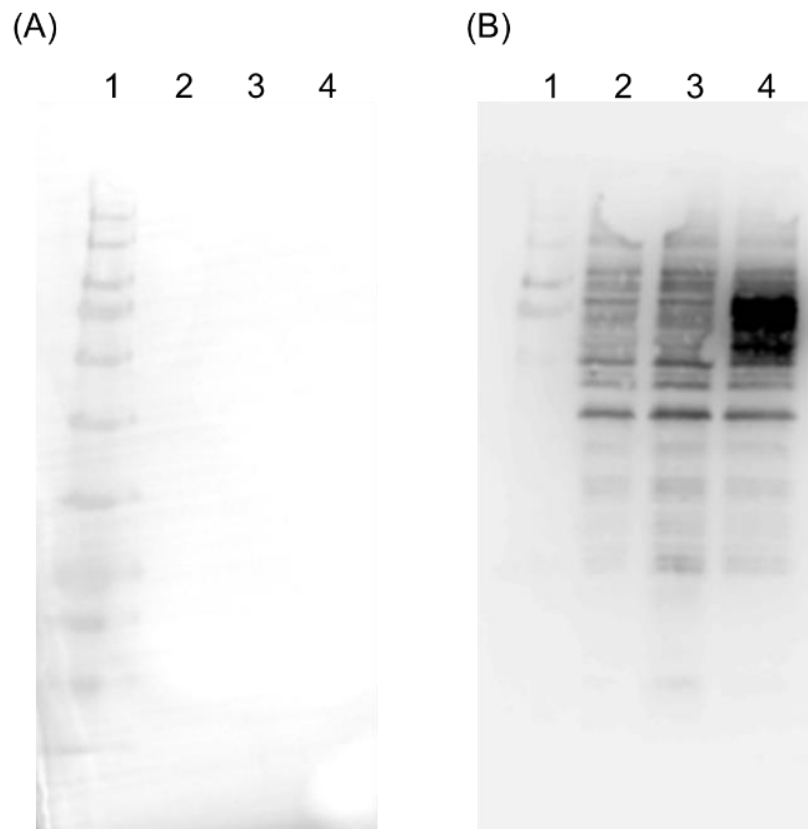

**Supplementary Figure S1.** Full-size and low-contrast images of the gel. Bright field (A) and chemiluminescence (B) images were shown. Lane 1, protein size marker; lane 2, untreated HEK-Blue hTLR9 cells; lane 3, mock-transfected HEK-Blue hTLR9 cells; lane 4, HEK-Blue hTLR9/hMSR1 cells.

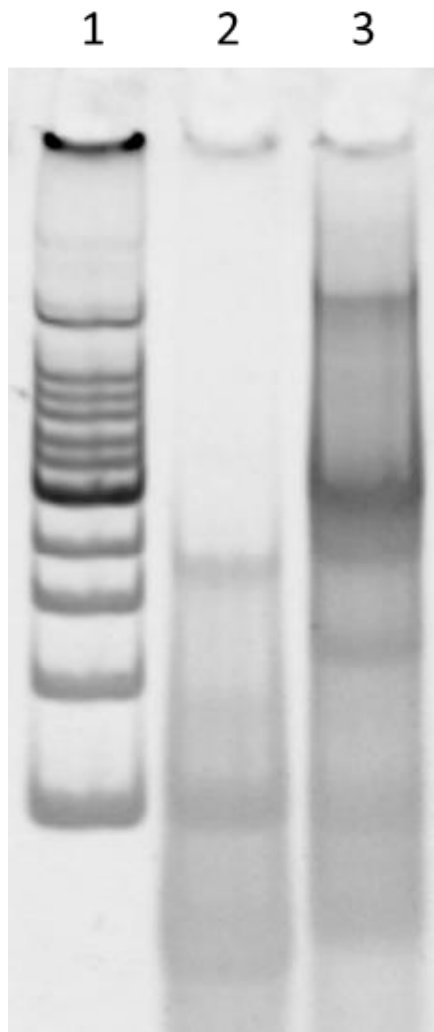

**Supplementary Figure S2.** Full-size and low-contrast image of the gel. Lane 1, 100 bp ladder; lane 2, ssCpG; lane 3, tetraCpG.
